# Supplementary material for: The Role of Stress Granules in the Neuronal Differentiation of Stem Cells
Source: PubMed Central journal article supplement — Mol Cells. 2020 Oct 8;43(10):848–55. doi: 10.14348/molcells.2020.0135 (PMC7604023; doi:10.14348/molcells.2020.0135), 2020-10-08
Supplement: molce-43-848_Supple.pdf [file molce-43-848_Supple.pdf]

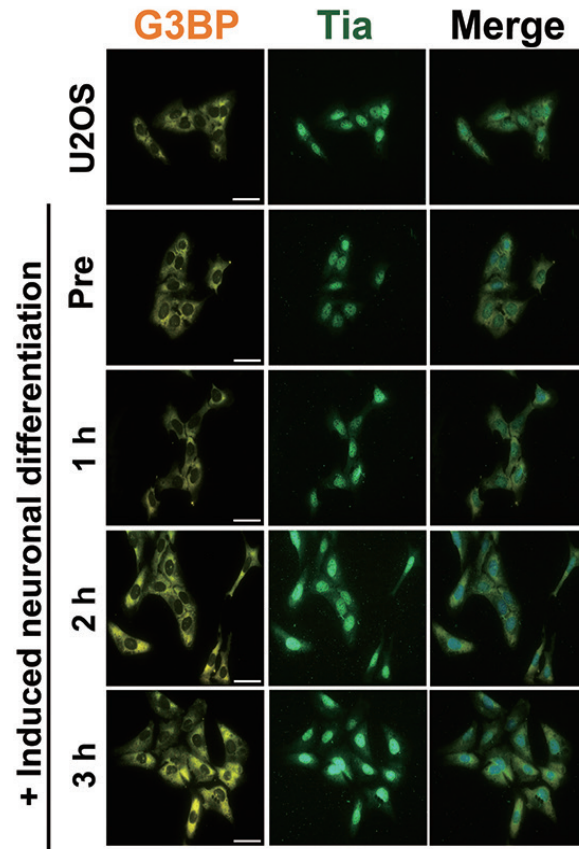

**Supplementary Fig. 1. SGs are not apparent in non-stem cells.** U2OS cells were incubated with pre-induction media and induction media in the same condition as Fig. 1A. Scale bars = 50  $\mu$ m.
